# Supplementary material for: Tunable interfaces on tetracene and pentacene thin-films via monolayers
Source: Royal Society of Chemistry journal article supplement (doi:10.1039/c6ce00728g), 2016-01-01
Supplement: c6ce00728g1.pdf [file c6ce00728g1.pdf]

## Tunable Interfaces on Tetracene and Pentacene Thin-Films via Monolayers

Selma Piranej,<sup>a</sup> David A. Turner,<sup>a</sup> Shawn M. Dalke,<sup>a</sup> Haejun Park,<sup>a</sup> Brittini A. Qualizza,<sup>a</sup> Juvinch Vicente,<sup>b</sup> Jixin Chen,<sup>b</sup> Jacob W. Ciszek<sup>\*a</sup>

Address

<sup>a</sup> Department of Chemistry and Biochemistry, Loyola University Chicago,  
Chicago, Illinois 60660, USA, Email: [jciszek@luc.edu](mailto:jciszek@luc.edu),

<sup>b</sup> Department of Chemistry and Biochemistry, Ohio University, Athens, Ohio 45701, USA

### Table of Contents

#### **IR Spectra of Organic Compounds and Substrates**

|                                                                                                      |      |
|------------------------------------------------------------------------------------------------------|------|
| ATR-IR spectrum of the standard <i>N</i> -methylmaleimide                                            | ...2 |
| ATR-IR of standard tetracene                                                                         | ...2 |
| ATR-IR of the standard tetracene- <i>N</i> -methylmaleimide adduct                                   | ...3 |
| ATR-IR of a 10:1 mole ratio of tetracene to the standard tetracene- <i>N</i> -methylmaleimide adduct | ...3 |

#### **Additional Regions of Interest from Tetracene Reacted Surfaces**

|                                                                                  |      |
|----------------------------------------------------------------------------------|------|
| Tetracene film reacted with <i>N</i> -methylmaleimide 1225-1075 cm <sup>-1</sup> | ...4 |
| Tetracene film reacted with <i>N</i> -methylmaleimide 1350-1200 cm <sup>-1</sup> | ...4 |

#### **IR Spectrum for Sublimed *N*-methylmaleimide**

|                                                               |      |
|---------------------------------------------------------------|------|
| <i>N</i> -methylmaleimide sublimed onto a tetracene thin film | ...5 |
|---------------------------------------------------------------|------|

#### **AFM data**

|                                       |       |
|---------------------------------------|-------|
| Unreacted and reacted tetracene films | ....5 |
|---------------------------------------|-------|

#### **Additional Regions of Interest from Tetracene Reacted Surfaces**

|                                                                                  |      |
|----------------------------------------------------------------------------------|------|
| Pentacene film reacted with <i>N</i> -methylmaleimide 1200-1050 cm <sup>-1</sup> | ...6 |
|----------------------------------------------------------------------------------|------|

|                           |        |
|---------------------------|--------|
| <b>Contact Angle Data</b> | ...6-7 |
|---------------------------|--------|

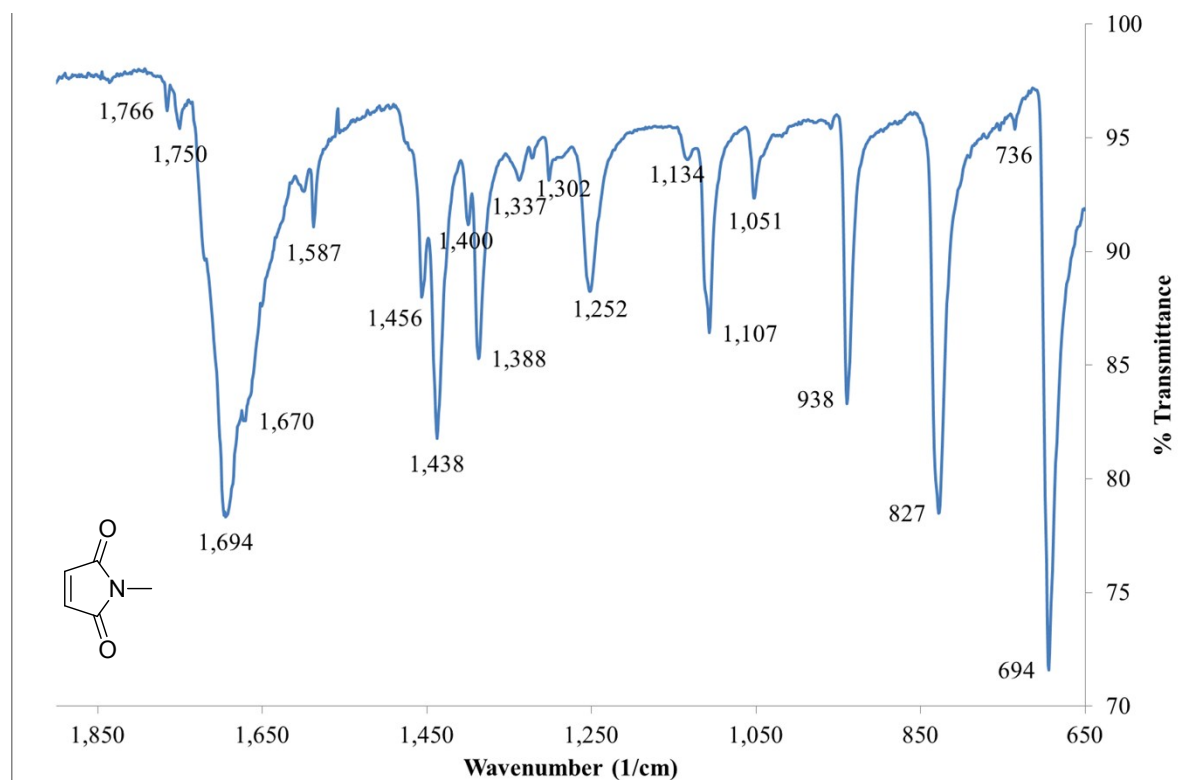

Fig. S1: An ATR-IR spectrum of the standard N-methylmaleimide from 1900-650  $\text{cm}^{-1}$ .

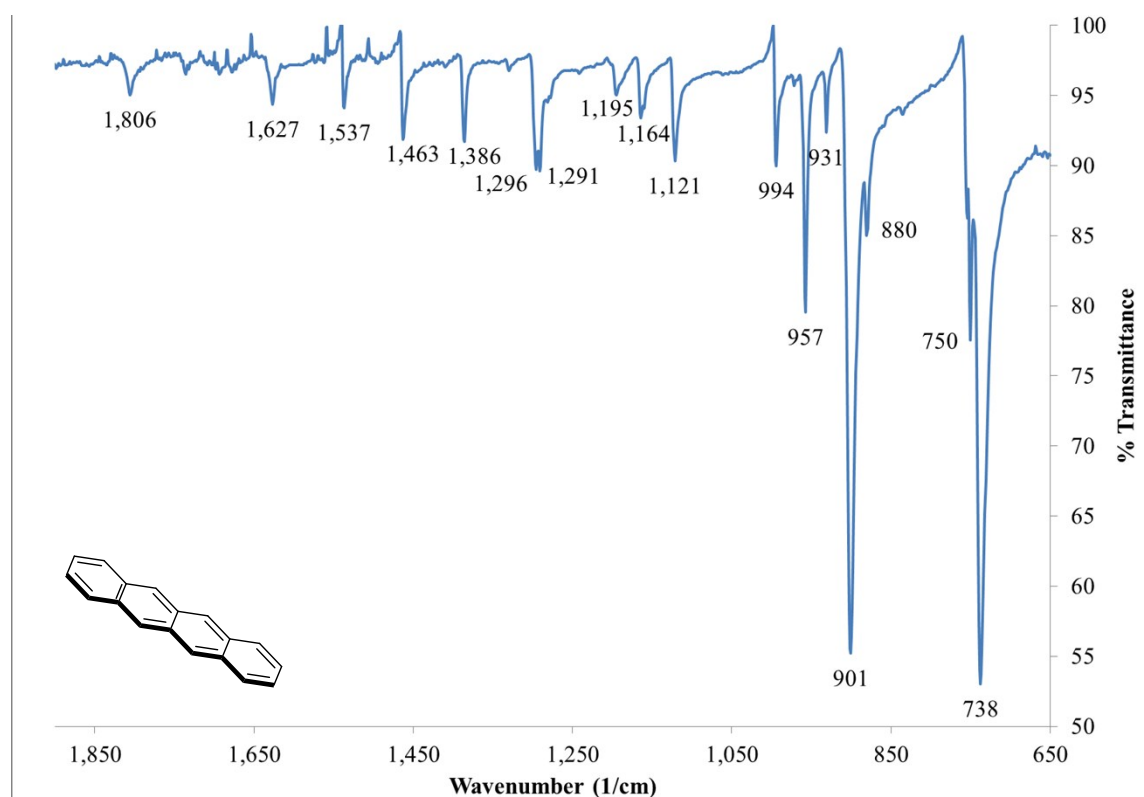

Fig. S2: An ATR-IR of standard tetracene from 1900-650  $\text{cm}^{-1}$ .

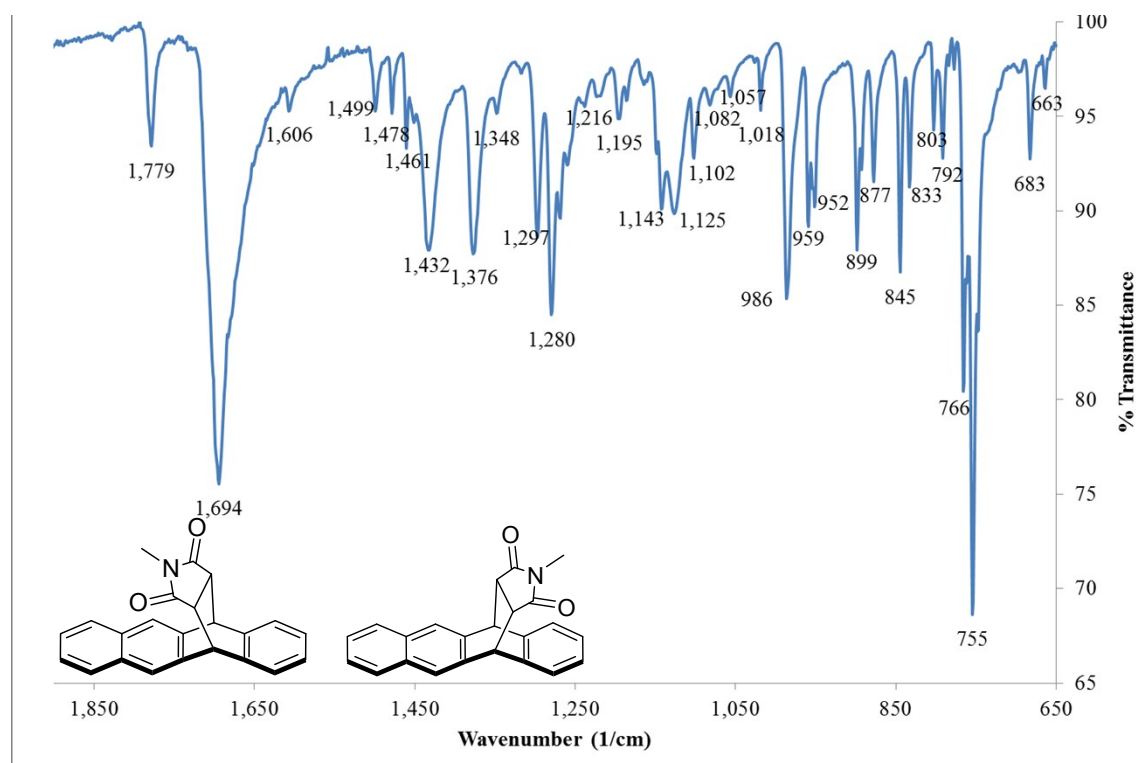

Fig. S3: An ATR-IR of the standard tetracene-*N*-methylmaleimide adduct from 1900-650  $\text{cm}^{-1}$ .

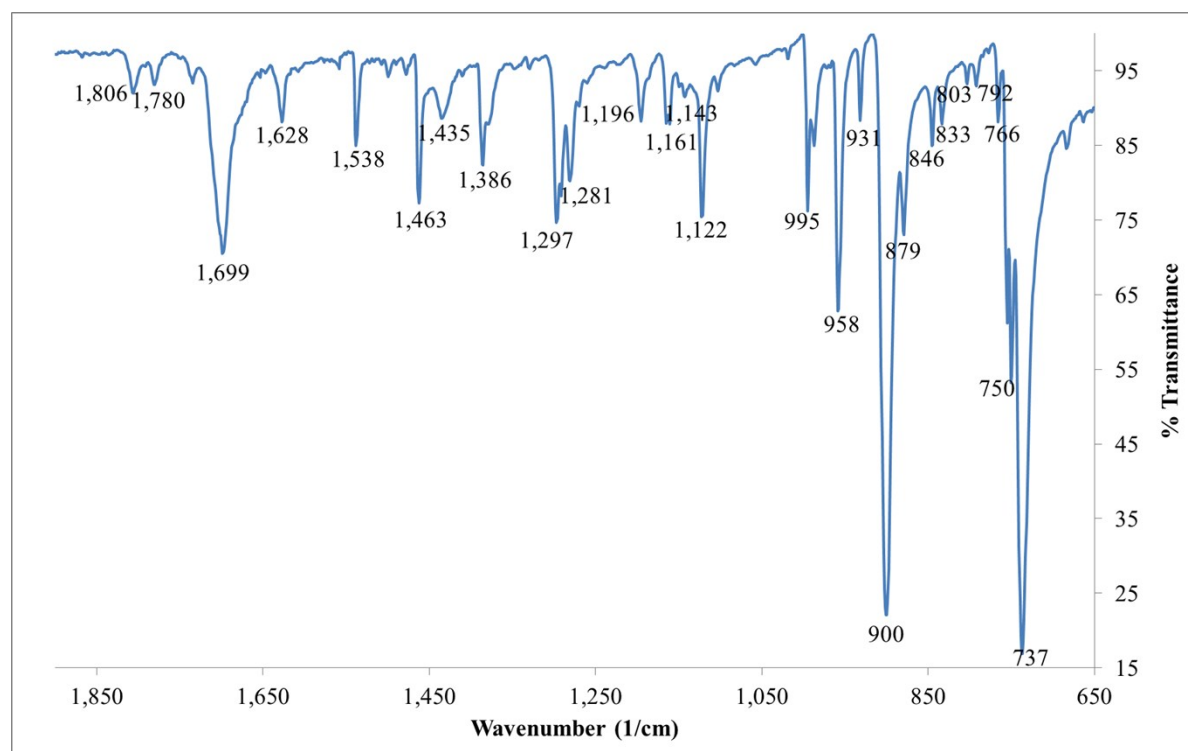

Fig. S4: An ATR-IR of a 10:1 mole ratio of tetracene to the standard tetracene-*N*-methylmaleimide adduct.

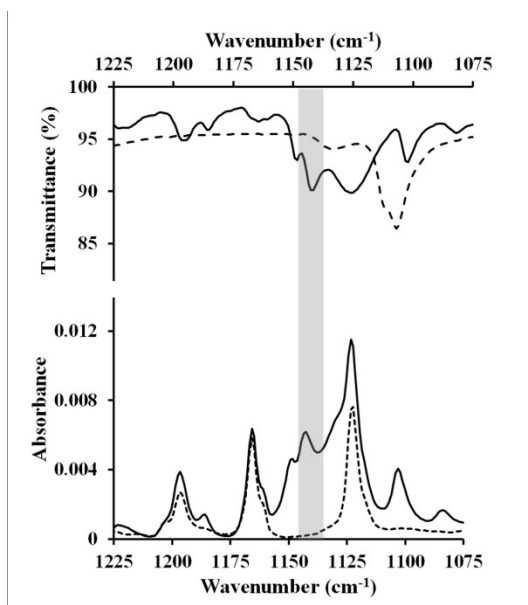

Fig. S5: A comparison of a PMIRRAS-IR spectrum of a film of tetracene that was exposed to N-methylmaleimide (below) with the standard powder adduct taken via ATR-IR (above). The ATR-IR spectrum shows that N-methylmaleimide (dashed line) has little absorption above  $1100\text{ cm}^{-1}$  allowing this region to be used for observing formation of the standard Diels- Alder adduct (solid line, above and below). The diagnostic peak at  $1143\text{ cm}^{-1}$  is observed in the reacted substrate (solid line, bottom), and is not present in the pristine thin film (dashed line).

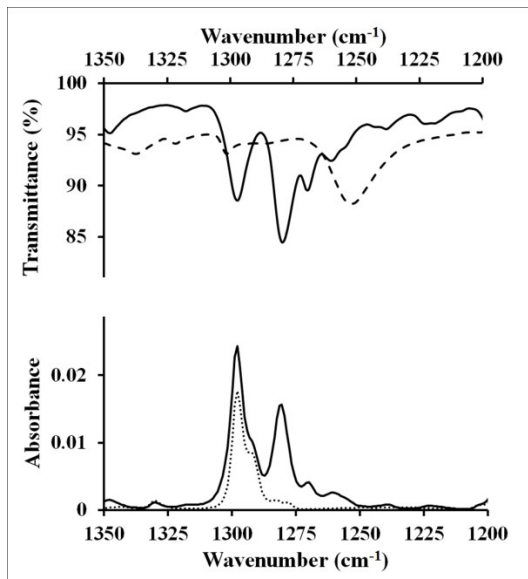

Fig. S6: A comparison of a PMIRRAS-IR spectrum of a film of tetracene that was exposed to N-methylmaleimide (below) with the standard powder adduct taken via ATR-IR (above). The PMIRRAS-IR spectrum shows tetracene (dotted line) and the Diels-Alder adduct film (solid line) and the appearance of a peak at  $1280\text{ cm}^{-1}$ . The ATR-IR spectrum displays N-methylmaleimide (dashed line) and the standard Diels-Alder adduct (solid line). The peak at  $1280\text{ cm}^{-1}$  indicates formation of the Diels-Alder adduct.

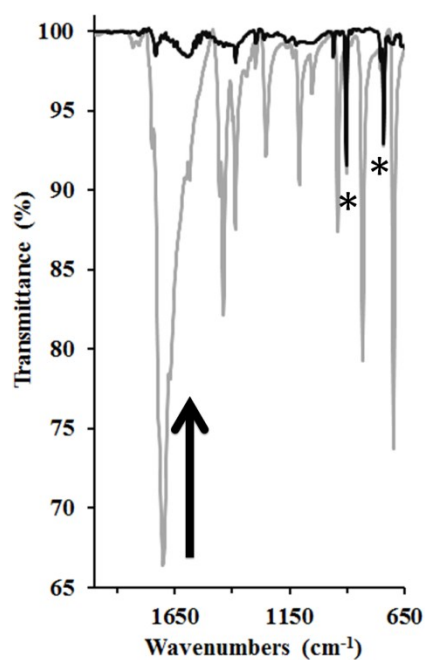

Fig. S7: Light gray line is a tetracene thin-film on a salt plate with N-methylmaleimide sublimed on top. After 5 min exposure to a gentle stream of nitrogen (black line) the N-methylmaleimide features (e.g. 1705  $\text{cm}^{-1}$ , arrow) disappear, leaving only vibrations from the tetracene thin film (starred).

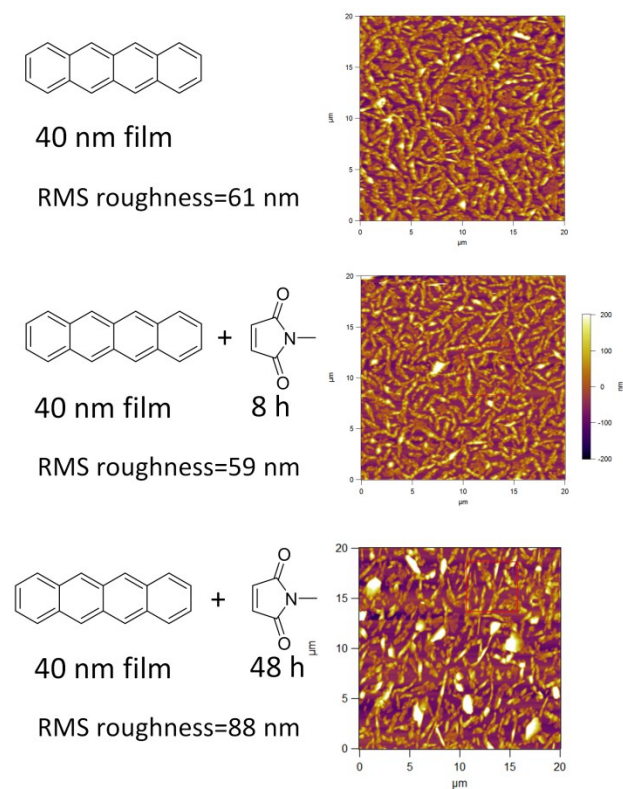

Fig. S8: AFM data of unreacted and reacted tetracene films. RMS data is for the scanned window.

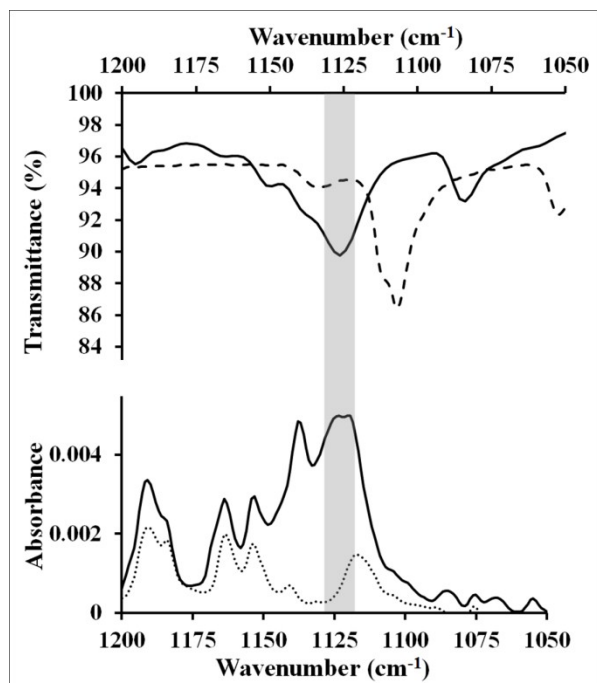

Fig. S9: A comparison of a PMIRRAS-IR spectrum of a film of pentacene that was exposed to N-methylmaleimide (below) with the standard powder adduct taken via ATR-IR (above). The PMIRRAS-IR spectrum shows tetracene (dotted line) and the Diels-Alder adduct film (solid line) and the appearance of a peak at  $1126\text{ cm}^{-1}$ . The ATR-IR spectrum displays N-methylmaleimide (dashed line) and the standard Diels-Alder adduct (solid line). The diagnostic peak at  $1126\text{ cm}^{-1}$  indicates formation of the Diels-Alder adduct.

## Contact Angle Data

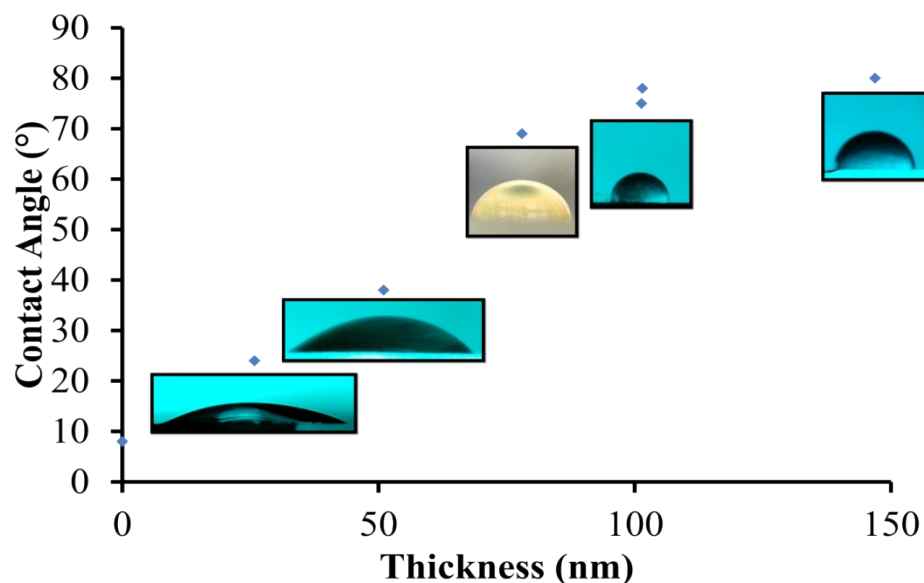

Fig. S10: A graph of contact angle ( $^{\circ}$ ) versus thickness (nm) of tetracene used to determine the baseline contact angle.

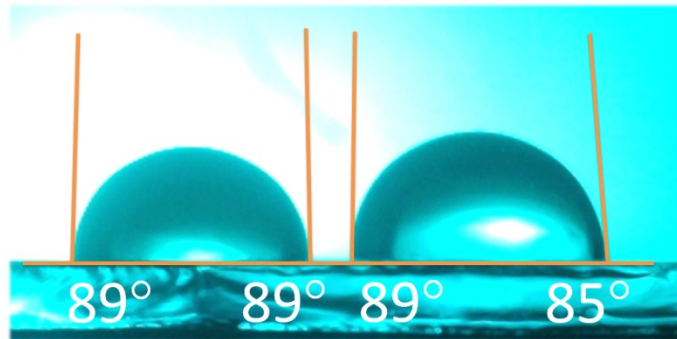

*Fig. S11: Contact angle measurement on a 100 nm tetracene surface after exposure to water vapor for 48h.*
